# Supplementary material for: Efficient bluish green electroluminescence of iridium complexes with good electron mobility
Source: Royal Society of Chemistry journal article supplement (doi:10.1039/c8nj01726c), 2018-01-01
Supplement: c8nj01726c1.pdf [file c8nj01726c1.pdf]

## Supporting Information

### Efficient bluish green electroluminescence of iridium complexes with good electron mobility

Hua-Bo Han<sup>1</sup>, Zheng-Guang Wu<sup>1</sup>, You-Xuan Zheng<sup>1,2\*</sup>

<sup>1</sup> State Key Laboratory of Coordination Chemistry, Jiangsu Key Laboratory of Advanced Organic Materials, Collaborative Innovation Center of Advanced Microstructures, School of Chemistry and Chemical Engineering, Nanjing University, Nanjing 210093, P. R. China, yxzheng@nju.edu.cn

<sup>2</sup> Shenzhen Research Institute of Nanjing University, Shenzhen 518057, P. R. China

### General information

<sup>1</sup>H NMR spectra were measured on a Bruker AM 500 spectrometer. Electrospray ionization mass spectra (ESI-MS) were obtained with ESI-MS (LCQ Fleet, Thermo Fisher Scientific). Elemental analyses for C, H and N were performed on an Elementar Vario MICRO analyzer. TG-DSC measurements were carried out on a DSC 823e analyzer (METTLER). UV-vis absorption and photoluminescence spectra were measured on a Shimadzu UV-3100 and a Hitachi F-4600 spectrophotometer at room temperature, respectively. Cyclic voltammetry measurements were conducted on a MPI-A multifunctional electrochemical and chemiluminescent system at room temperature using Fc<sup>+</sup>/Fc as the internal standard and scan rate of 0.05 V s<sup>-1</sup>. The luminescence quantum efficiencies were calculated by comparison of the emission intensities (integrated areas) of a standard sample (*fac*-Ir(ppy)<sub>3</sub>) and the unknown sample.<sup>1</sup>

### X-ray crystallography

X-ray crystallographic measurements of the single crystals were carried out on a Bruker SMART CCD diffractometer (Bruker Daltonic Inc.) using monochromated Mo K $\alpha$  radiation ( $\lambda = 0.71073 \text{ \AA}$ ) at room temperature. Cell parameters were retrieved using SMART software and refined using *SAINTE*<sup>2</sup> program in order to reduce the highly redundant data sets. Data were collected using a narrow-frame method with scan width of 0.30° in  $\omega$  and an exposure time of 5 s per frame. Absorption corrections were applied using *SADABS*<sup>3</sup> supplied by

Bruker. The structures were solved by Patterson methods and refined by full-matrix least-squares on  $F^2$  using the program *SHELXS-2014*.<sup>4</sup> The positions of metal atoms and their first coordination spheres were located from direct-methods E-maps, other non-hydrogen atoms were found in alternating difference Fourier syntheses and least-squares refinement cycles and during the final cycles refined anisotropically. Hydrogen atoms were placed in calculated position and refined as riding atoms with a uniform value of  $U_{\text{iso}}$ .

### **OLEDs fabrication and measurement**

All OLEDs were fabricated on the pre-patterned ITO-coated glass substrate with a sheet resistance of 15  $\Omega$  / sq. The deposition rate for organic compounds (TAPC (1,1-*bis*(4-(di-*p*-tolylamino)phenyl)cyclohexane, mCP (1,3-*bis*(9H-carbazol-9-yl)benzene, PPO21 3-(diphenylphosphoryl)-9-(4-(diphenyl-phosphoryl)phenyl)-9H-carbazole, TmPyPB (1,3,5-*tri*(*m*-pyrid-3-yl-phenyl) benzene)) is 1  $\text{\AA}$ /s. The phosphors and the host PPO21 was co-evaporated to form emitting layer from two separate sources. The cathode of LiF and Al were deposited with deposition rates of 0.1 and 3  $\text{\AA}$ /s, respectively. The characteristic curves of the devices were measured with a computer which controlled KEITHLEY 2400 source meter with a calibrated silicon diode in air without device encapsulation. On the basis of the uncorrected PL and EL spectra, the Commission Internationale de l'Eclairage (CIE) coordinates were calculated using a test program of the Spectra scan PR650 spectrophotometer.

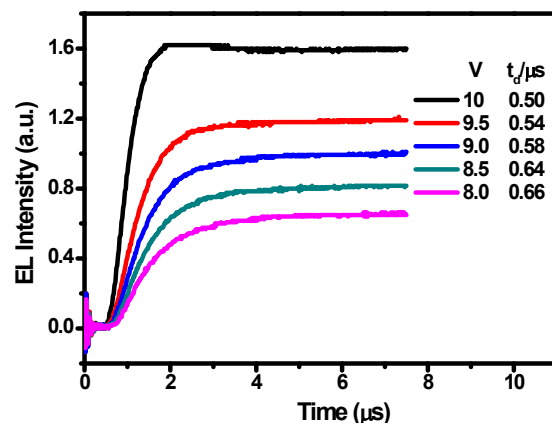

**Figure S1** the transient EL signals for the device structure of ITO/TAPC (50nm)/Ir complexes (60nm)/ LiF (1 nm)/ Al (100 nm) under different applied fields of **Ir1**.

**Table S1.** Crystallographic data of Ir1 and Ir2.

|                                                                                                                | Ir1                                                                                           | Ir2                                                                                           |
|----------------------------------------------------------------------------------------------------------------|-----------------------------------------------------------------------------------------------|-----------------------------------------------------------------------------------------------|
| Formula                                                                                                        | C <sub>42</sub> H <sub>28</sub> F <sub>6</sub> IrN <sub>9</sub> O <sub>2</sub> P <sub>2</sub> | C <sub>42</sub> H <sub>26</sub> F <sub>8</sub> IrN <sub>9</sub> O <sub>2</sub> P <sub>2</sub> |
| FW                                                                                                             | 1058.46                                                                                       | 1094.88                                                                                       |
| T (K)                                                                                                          | 296                                                                                           | 296                                                                                           |
| Wavelength (Å)                                                                                                 | 0.71073                                                                                       | 0.71073                                                                                       |
| Crystal system                                                                                                 | monoclinic                                                                                    | monoclinic                                                                                    |
| Space group                                                                                                    | P 21/c                                                                                        | P 21/c                                                                                        |
| <i>a</i> (Å)                                                                                                   | 11.5095(6)                                                                                    | 11.479(3)                                                                                     |
| <i>b</i> (Å)                                                                                                   | 16.3355(9)                                                                                    | 15.111(4)                                                                                     |
| <i>c</i> (Å)                                                                                                   | 22.6258(12)                                                                                   | 24.778(7)                                                                                     |
| $\alpha$ (deg)                                                                                                 | 90                                                                                            | 90                                                                                            |
| $\beta$ (deg)                                                                                                  | 99.990(1)                                                                                     | 97.796(5)                                                                                     |
| $\gamma$ (deg)                                                                                                 | 90                                                                                            | 90                                                                                            |
| <i>V</i> (Å <sup>3</sup> )                                                                                     | 4189.5(4)                                                                                     | 4258(2)                                                                                       |
| <i>Z</i>                                                                                                       | 4                                                                                             | 4                                                                                             |
| $\rho_{\text{calcd}}$ (g/cm <sup>3</sup> )                                                                     | 1.678                                                                                         | 1.708                                                                                         |
| $\mu$ (Mo K $\alpha$ ) (mm <sup>-1</sup> )                                                                     | 3.339                                                                                         | 3.295                                                                                         |
| <i>F</i> (000)                                                                                                 | 2079.2                                                                                        | 2144.0                                                                                        |
| Reflns collected                                                                                               | 29798                                                                                         | 28582                                                                                         |
| Unique                                                                                                         | 10356                                                                                         | 9712                                                                                          |
| Data/restraints/params                                                                                         | 10356 / 6 / 692                                                                               | 9712 / 1 / 577                                                                                |
| GOF on <i>F</i> <sup>2</sup>                                                                                   | 1.019                                                                                         | 1.028                                                                                         |
| <i>R</i> <sub>1</sub> <sup>a</sup> , <i>wR</i> <sub>2</sub> <sup>b</sup> [ <i>I</i> > 2 $\sigma$ ( <i>I</i> )] | 0.0277, 0.0569                                                                                | 0.0413, 0.0887                                                                                |
| <i>R</i> <sub>1</sub> <sup>a</sup> , <i>wR</i> <sub>2</sub> <sup>b</sup> (all data)                            | 0.0437, 0.0645                                                                                | 0.0626, 0.0969                                                                                |
| CCDC NO                                                                                                        | 1584485                                                                                       | 1584486                                                                                       |

$$R_1^a = \frac{\sum ||F_o| - |F_c||}{\sum F_o}. \quad wR_2^b = \left[ \frac{\sum w(F_o^2 - F_c^2)^2}{\sum w(F_o^2)} \right]^{1/2}$$

**Table S2(a)** The selected bond lengths and angles of Ir1.

| <b>Selected bonds Å</b> |            |             |           |         |           |
|-------------------------|------------|-------------|-----------|---------|-----------|
| Ir1-O1                  | 2.195(2)   | N7-C28      | 1.341(5)  | C20-C21 | 1.408(6)  |
| Ir1-O2                  | 2.207(2)   | N8-C30      | 1.362(4)  | C21-C22 | 1.376(8)  |
| Ir1-N5                  | 2.044(2)   | N8-C31      | 1.334(4)  | C22-C23 | 1.352(8)  |
| Ir1-N8                  | 2.043(2)   | N9-C30      | 1.324(4)  | C23-C24 | 1.361(7)  |
| Ir1-C27                 | 1.959(3)   | N9-C32      | 1.328(5)  | C25-C26 | 1.529(6)  |
| Ir1-C36                 | 1.962(3)   | C1-C2       | 1.374(6)  | C25-F4  | 1.265(19) |
| P1-O1                   | 1.522(2)   | C1-C6       | 1.391(6)  | C25-F6  | 1.274(9)  |
| P1-N1                   | 1.584(3)   | C2-C3       | 1.410(7)  | C25-F4A | 1.260(10) |
| P1-C1                   | 1.794(3)   | C3-C4       | 1.349(10) | C27-C29 | 1.415(5)  |
| P1-C7                   | 1.817(4)   | C4-C5       | 1.349(10) | C28-C29 | 1.368(5)  |
| P2-O2                   | 1.514(2)   | C5-C6       | 1.374(7)  | C29-C30 | 1.462(5)  |
| P2-N1                   | 1.579(3)   | C7-C8       | 1.378(5)  | C31-C33 | 1.374(5)  |
| P2-C13                  | 1.795(3)   | C7-C12      | 1.375(5)  | C32-C33 | 1.374(6)  |
| P2-C19                  | 1.803(3)   | C8-C9       | 1.385(6)  | C34-C35 | 1.531(6)  |
| F5-C25                  | 1.275(8)   | C9-C10      | 1.350(7)  | C34-F1  | 1.285(10) |
| N2-C35                  | 1.305(5)   | C10-C11     | 1.358(6)  | C34-F2  | 1.317(9)  |
| N2-C37                  | 1.350(5)   | C11-C12     | 1.374(6)  | C34-F3  | 1.247(14) |
| N3-C35                  | 1.337(5)   | C13-C14     | 1.384(5)  | C34-F1A | 1.200(13) |
| N3-C36                  | 1.352(4)   | C13-C18     | 1.377(5)  | C34-F2A | 1.342(17) |
| N4-C39                  | 1.329(4)   | C14-C15     | 1.377(7)  | C34-F3A | 1.315(18) |
| N4-C41                  | 1.338(5)   | C15-C16     | 1.362(8)  | C36-C38 | 1.414(4)  |
| N5-C39                  | 1.353(4)   | C16-C17     | 1.375(8)  | C37-C38 | 1.373(5)  |
| N5-C40                  | 1.341(4)   | C17-C18     | 1.387(6)  | C38-C39 | 1.454(4)  |
| N6-C26                  | 1.333(4)   | C19-C20     | 1.383(5)  | C40-C42 | 1.375(5)  |
| N6-C27                  | 1.344(4)   | C19-C24     | 1.392(5)  | C41-C42 | 1.371(6)  |
| N7-C26                  | 1.316(5)   | --          | --        | --      | --        |
| <b>Selected angles°</b> |            |             |           |         |           |
| O1-Ir1-O2               | 90.66(8)   | C15-C16-C17 | 121.2(5)  |         |           |
| N5-Ir1-O1               | 90.08(9)   | C16-C17-C18 | 118.7(5)  |         |           |
| N5-Ir1-O2               | 93.70(9)   | C13-C18-C17 | 120.9(5)  |         |           |
| N8-Ir1-O1               | 93.68(9)   | C20-C19-P2  | 121.1(3)  |         |           |
| N8-Ir1-O2               | 91.15(9)   | C20-C19-C24 | 119.1(4)  |         |           |
| N8-Ir1-N5               | 173.83(10) | C24-C19-P2  | 119.8(3)  |         |           |
| C27-Ir1-O1              | 172.88(11) | C19-C20-C21 | 118.8(4)  |         |           |
| C27-Ir1-O2              | 84.56(11)  | C22-C21-C20 | 119.1(5)  |         |           |
| C27-Ir1-N5              | 95.48(12)  | C23-C22-C21 | 122.5(5)  |         |           |
| C27-Ir1-N8              | 81.17(12)  | C22-C23-C24 | 118.4(5)  |         |           |
| C27-Ir1-C36             | 94.80(13)  | C23-C24-C19 | 122.0(5)  |         |           |
| C36-Ir1-O1              | 90.45(11)  | F5-C25-C26  | 112.2(6)  |         |           |
| C36-Ir1-O2              | 174.52(10) | F4-C25-F5   | 133.4(15) |         |           |
| C36-Ir1-N5              | 80.93(12)  | F4-C25-C26  | 111.4(9)  |         |           |
| C36-Ir1-N8              | 94.14(12)  | F4-C25-F6   | 77(2)     |         |           |
| O1-P1-N1                | 118.75(14) | F6-C25-F5   | 101.8(5)  |         |           |
| O1-P1-C1                | 108.21(17) | F6-C25-C26  | 110.7(6)  |         |           |

|             |            |             |           |
|-------------|------------|-------------|-----------|
| O1-P1-C7    | 108.69(14) | F4A-C25-F5  | 96.8(14)  |
| N1-P1-C1    | 106.98(17) | F4A-C25-C26 | 114.4(6)  |
| N1-P1-C7    | 107.25(17) | N6-C26-C25  | 113.8(4)  |
| C1-P1-C7    | 106.30(15) | N7-C26-N6   | 129.9(4)  |
| O2-P2-N1    | 117.52(14) | N7-C26-C25  | 116.3(4)  |
| O2-P2-C13   | 109.00(14) | N6-C27-Ir1  | 125.8(2)  |
| O2-P2-C19   | 109.03(15) | N6-C27-C29  | 119.2(3)  |
| N1-P2-C13   | 107.71(17) | C29-C27-Ir1 | 114.6(2)  |
| N1-P2-C19   | 108.72(17) | N7-C28-C29  | 122.0(4)  |
| C13-P2-C19  | 104.01(15) | C27-C29-C30 | 115.4(3)  |
| P1-O1-Ir1   | 124.72(12) | C28-C29-C27 | 118.8(3)  |
| P2-O2-Ir1   | 123.43(12) | C28-C29-C30 | 125.7(3)  |
| P2-N1-P1    | 126.5(2)   | N8-C30-C29  | 113.0(3)  |
| C35-N2-C37  | 114.4(3)   | N9-C30-N8   | 124.6(3)  |
| C35-N3-C36  | 115.5(3)   | N9-C30-C29  | 122.3(3)  |
| C39-N4-C41  | 116.7(3)   | N8-C31-C33  | 120.5(3)  |
| C39-N5-Ir1  | 115.0(2)   | N9-C32-C33  | 122.5(4)  |
| C40-N5-Ir1  | 126.8(2)   | C31-C33-C32 | 118.0(4)  |
| C40-N5-C39  | 118.2(3)   | F1-C34-C35  | 111.3(6)  |
| C26-N6-C27  | 115.6(3)   | F1-C34-F2   | 106.2(13) |
| C26-N7-C28  | 114.4(3)   | F2-C34-C35  | 112.6(5)  |
| C30-N8-Ir1  | 115.4(2)   | F3-C34-C35  | 111.8(7)  |
| C31-N8-Ir1  | 126.9(2)   | F3-C34-F1   | 107.4(17) |
| C31-N8-C30  | 117.7(3)   | F3-C34-F2   | 107.1(17) |
| C30-N9-C32  | 116.7(3)   | F1A-C34-C35 | 116.4(8)  |
| C2-C1-P1    | 120.7(3)   | F1A-C34-F2A | 115(3)    |
| C2-C1-C6    | 119.2(4)   | F1A-C34-F3A | 105(3)    |
| C6-C1-P1    | 120.1(3)   | F2A-C34-C35 | 105.8(10) |
| C1-C2-C3    | 119.6(6)   | F3A-C34-C35 | 114.8(7)  |
| C4-C3-C2    | 119.8(7)   | F3A-C34-F2A | 98(3)     |
| C3-C4-C5    | 120.6(5)   | N2-C35-N3   | 130.5(4)  |
| C4-C5-C6    | 121.2(6)   | N2-C35-C34  | 115.9(4)  |
| C5-C6-C1    | 119.6(5)   | N3-C35-C34  | 113.6(4)  |
| C8-C7-P1    | 121.0(3)   | N3-C36-Ir1  | 126.7(2)  |
| C12-C7-P1   | 120.8(3)   | N3-C36-C38  | 118.6(3)  |
| C12-C7-C8   | 118.1(4)   | C38-C36-Ir1 | 114.6(2)  |
| C7-C8-C9    | 120.3(5)   | N2-C37-C38  | 121.4(4)  |
| C10-C9-C8   | 120.7(5)   | C36-C38-C39 | 115.2(3)  |
| C9-C10-C11  | 119.4(5)   | C37-C38-C36 | 119.5(3)  |
| C10-C11-C12 | 121.0(5)   | C37-C38-C39 | 125.1(3)  |
| C11-C12-C7  | 120.5(4)   | N4-C39-N5   | 124.2(3)  |
| C14-C13-P2  | 120.2(3)   | N4-C39-C38  | 122.1(3)  |
| C18-C13-P2  | 120.8(3)   | N5-C39-C38  | 113.7(3)  |
| C18-C13-C14 | 118.9(4)   | N5-C40-C42  | 120.4(3)  |
| C15-C14-C13 | 120.4(5)   | N4-C41-C42  | 122.7(4)  |
| C16-C15-C14 | 119.8(5)   | C41-C42-C40 | 117.7(4)  |

**Table S2(b)** The selected bond lengths and angles of **Ir2**.

| <b>Selected bonds Å</b> |            |                   |            |             |           |
|-------------------------|------------|-------------------|------------|-------------|-----------|
| Ir(1)-C(55)             | 1.956(5)   | C(14)-C(62)       | 1.376(9)   | C(36)-H(36) | 0.93      |
| Ir(1)-C(10)             | 1.965(5)   | C(14)-C(23)       | 1.381(8)   | C(37)-C(49) | 1.319(12) |
| Ir(1)-N(7)              | 2.039(4)   | C(15)-C(60)       | 1.358(7)   | C(37)-C(69) | 1.329(12) |
| Ir(1)-N(8)              | 2.046(4)   | C(15)-C(55)       | 1.417(6)   | C(37)-H(37) | 0.9300    |
| Ir(1)-O(2)              | 2.200(3)   | C(15)-C(56)       | 1.455(7)   | C(38)-C(66) | 1.354(10) |
| Ir(1)-O(1)              | 2.212(3)   | C(16)-N(9)        | 1.321(6)   | C(43)-H(43) | 0.93      |
| P(1)-O(1)               | 1.529(3)   | C(17)-N(1)        | 1.317(7)   | C(46)-H(46) | 0.93      |
| P(1)-N(5)               | 1.593(5)   | C(21)-C(63)       | 1.503(8)   | C(47)-C(69) | 1.386(11) |
| P(1)-C(30)              | 1.796(5)   | C(22)-C(28)       | 1.356(8)   | C(47)-H(47) | 0.93      |
| P(1)-C(13)              | 1.799(5)   | C(22)-H(22)       | 0.93       | C(48)-H(48) | 0.93      |
| P(2)-O(2)               | 1.523(3)   | C(23)-C(46)       | 1.362(9)   | C(49)-H(49) | 0.93      |
| P(2)-N(5)               | 1.583(5)   | C(23)-H(23)       | 0.93       | N(7)-C(59)  | 1.337(7)  |
| P(2)-C(14)              | 1.798(6)   | C(24)-C(67)       | 1.399(9)   | N(7)-C(56)  | 1.362(6)  |
| P(2)-C(12)              | 1.801(5)   | C(24)-H(24)       | 0.93       | F(8)-C(57)  | 1.343(7)  |
| N(8)-C(22)              | 1.334(7)   | C(25)-H(25)       | 0.93       | C(57)-C(58) | 1.362(10) |
| N(8)-C(16)              | 1.353(6)   | C(26)-C(27)       | 1.388(8)   | C(57)-C(59) | 1.367(8)  |
| N(2)-C(17)              | 1.331(6)   | C(26)-H(26)       | 0.93       | C(58)-H(58) | 0.93      |
| N(2)-C(55)              | 1.344(6)   | C(27)-C(33)       | 1.370(9)   | C(59)-H(59) | 0.93      |
| F(4)-C(28)              | 1.343(7)   | C(27)-H(27)       | 0.93       | C(60)-H(60) | 0.93      |
| C(8)-C(25)              | 1.369(7)   | C(28)-C(43)       | 1.367(9)   | F(7)-C(63)  | 1.256(8)  |
| C(8)-C(10)              | 1.414(6)   | C(29)-F(2)        | 1.215(8)   | C(62)-C(68) | 1.408(12) |
| C(8)-C(16)              | 1.454(7)   | C(29)-F(1)        | 1.284(7)   | C(62)-H(62) | 0.93      |
| N(4)-C(21)              | 1.319(6)   | C(29)-F(3)        | 1.346(9)   | C(63)-F(6)  | 1.221(8)  |
| N(4)-C(10)              | 1.342(6)   | C(30)-C(41)       | 1.339(8)   | C(63)-F(5)  | 1.293(8)  |
| N(6)-C(56)              | 1.323(6)   | C(30)-C(47)       | 1.3798(11) | C(66)-C(67) | 1.335(10) |
| N(6)-C(58)              | 1.334(8)   | N(1)-C(60)        | 1.347(7)   | C(66)-H(66) | 0.93      |
| C(12)-C(36)             | 1.371(8)   | C(33)-C(48)       | 1.343(9)   | C(67)-H(67) | 0.93      |
| C(12)-C(24)             | 1.383(8)   | C(33)-H(33)       | 0.93       | C(68)-H(68) | 0.93      |
| C(13)-C(26)             | 1.380(7)   | C(36)-C(38)       | 1.394(8)   | C(69)-H(69) | 0.93      |
| C(13)-C(19)             | 1.389(7)   |                   |            |             |           |
| <b>Selected angles°</b> |            |                   |            |             |           |
| C(55)-Ir(1)-C(10)       | 86.40(19)  | F(2)-C(29)-F(3)   | 104.2(8)   |             |           |
| C(55)-Ir(1)-N(7)        | 81.12(18)  | F(1)-C(29)-F(3)   | 100.4(6)   |             |           |
| C(10)-Ir(1)-N(7)        | 90.58(18)  | F(2)-C(29)-C(17)  | 115.7(6)   |             |           |
| C(55)-Ir(1)-N(8)        | 95.73(17)  | F(1)-C(29)-C(17)  | 115.1(6)   |             |           |
| C(10)-Ir(1)-N(8)        | 80.99(18)  | F(3)-C(29)-C(17)  | 107.7(6)   |             |           |
| N(7)-Ir(1)-N(8)         | 171.20(16) | C(41)-C(30)-C(47) | 117.4(6)   |             |           |
| C(55)-Ir(1)-O(2)        | 172.59(16) | C(41)-C(30)-P(1)  | 122.5(4)   |             |           |
| C(10)-Ir(1)-O(2)        | 94.18(16)  | C(47)-C(30)-P(1)  | 120.0(5)   |             |           |
| N(7)-Ir(1)-O(2)         | 91.48(15)  | C(17)-N(1)-C(60)  | 114.2(5)   |             |           |
| N(8)-Ir(1)-O(2)         | 91.66(14)  | C(48)-C(33)-C(27) | 120.3(6)   |             |           |
| C(55)-Ir(1)-O(1)        | 91.40(16)  | C(48)-C(33)-H(33) | 119.8      |             |           |
| C(10)-Ir(1)-O(1)        | 171.20(16) | C(27)-C(33)-H(33) | 119.8      |             |           |
| N(7)-Ir(1)-O(1)         | 97.50(14)  | C(12)-C(36)-C(38) | 120.9(6)   |             |           |
| N(8)-Ir(1)-O(1)         | 90.77(14)  | C(12)-C(36)-H(36) | 119.5      |             |           |
| O(2)-Ir(1)-O(1)         | 89.10(12)  | C(38)-C(36)-H(36) | 119.5      |             |           |

|                   |          |                   |            |
|-------------------|----------|-------------------|------------|
| O(1)-P(1)-N(5)    | 116.3(2) | C(49)-C(37)-C(69) | 120.0(9)   |
| O(1)-P(1)-C(30)   | 108.7(2) | C(49)-C(37)-H(37) | 120.0      |
| N(5)-P(1)-C(30)   | 109.5(3) | C(69)-C(37)-H(37) | 120.0      |
| O(1)-P(1)-C(13)   | 108.9(2) | C(66)-C(38)-C(36) | 119.9(7)   |
| N(5)-P(1)-C(13)   | 108.0(3) | C(66)-C(38)-H(38) | 120.0      |
| C(30)-P(1)-C(13)  | 104.9(2) | C(36)-C(38)-H(38) | 120.0      |
| O(2)-P(2)-N(5)    | 117.6(2) | C(30)-C(41)-C(49) | 120.7(7)   |
| O(2)-P(2)-C(14)   | 106.5(2) | C(30)-C(41)-H(41) | 119.6      |
| N(5)-P(2)-C(14)   | 111.6(3) | C(49)-C(41)-H(41) | 119.6      |
| O(2)-P(2)-C(12)   | 107.6(2) | C(46)-C(42)-C(68) | 120.4(9)   |
| N(5)-P(2)-C(12)   | 106.0(3) | C(46)-C(42)-H(42) | 119.8      |
| C(14)-P(2)-C(12)  | 107.1(2) | C(68)-C(42)-H(42) | 119.8      |
| C(22)-N(8)-C(16)  | 118.1(4) | N(9)-C(43)-C(28)  | 121.7(6)   |
| C(22)-N(8)-Ir(1)  | 127.1(4) | N(9)-C(43)-H(43)  | 119.1      |
| C(16)-N(8)-Ir(1)  | 114.8(3) | C(28)-C(43)-H(43) | 119.1      |
| C(17)-N(2)-C(55)  | 115.8(4) | C(42)-C(46)-C(23) | 119.4(8)   |
| C(25)-C(8)-C(10)  | 118.3(5) | C(42)-C(46)-H(46) | 120.3      |
| C(25)-C(8)-C(16)  | 126.4(5) | C(23)-C(46)-H(46) | 120.3      |
| C(10)-C(8)-C(16)  | 115.2(4) | C(30)-C(47)-C(69) | 120.5(7)   |
| C(21)-N(4)-C(10)  | 116.0(4) | C(30)-C(47)-H(47) | 119.7      |
| N(4)-C(10)-C(8)   | 119.3(4) | C(69)-C(47)-H(47) | 119.7      |
| N(4)-C(10)-Ir(1)  | 125.9(4) | C(33)-C(48)-C(19) | 120.7(6)   |
| C(8)-C(10)-Ir(1)  | 114.4(4) | C(33)-C(48)-H(48) | 119.7      |
| C(56)-N(6)-C(58)  | 117.4(5) | C(19)-C(48)-H(48) | 119.7      |
| C(36)-C(12)-C(24) | 117.8(5) | C(37)-C(49)-C(41) | 120.9(9)   |
| C(36)-C(12)-P(2)  | 121.7(4) | C(37)-C(49)-H(49) | 119.5      |
| C(24)-C(12)-P(2)  | 120.5(5) | C(41)-C(49)-H(49) | 119.5      |
| C(26)-C(13)-C(19) | 118.4(5) | P(2)-O(2)-Ir(1)   | 123.05(19) |
| C(26)-C(13)-P(1)  | 119.4(4) | P(1)-O(1)-Ir(1)   | 121.26(18) |
| C(19)-C(13)-P(1)  | 122.1(4) | C(59)-N(7)-C(56)  | 117.9(5)   |
| C(62)-C(14)-C(23) | 116.8(6) | C(59)-N(7)-Ir(1)  | 126.0(4)   |
| C(62)-C(14)-P(2)  | 122.2(5) | C(56)-N(7)-Ir(1)  | 115.2(3)   |
| C(23)-C(14)-P(2)  | 120.9(5) | P(2)-N(5)-P(1)    | 123.3(3)   |
| C(60)-C(15)-C(55) | 119.0(5) | N(2)-C(55)-C(15)  | 119.0(4)   |
| C(60)-C(15)-C(56) | 125.9(5) | N(2)-C(55)-Ir(1)  | 126.0(3)   |
| C(55)-C(15)-C(56) | 115.1(4) | C(15)-C(55)-Ir(1) | 114.9(3)   |
| N(9)-C(16)-N(8)   | 124.6(5) | N(6)-C(56)-N(7)   | 124.2(5)   |
| N(9)-C(16)-C(8)   | 121.3(5) | N(6)-C(56)-C(15)  | 122.5(5)   |
| N(8)-C(16)-C(8)   | 114.0(4) | N(7)-C(56)-C(15)  | 113.3(4)   |
| N(1)-C(17)-N(2)   | 129.7(5) | F(8)-C(57)-C(58)  | 121.6(6)   |
| N(1)-C(17)-C(29)  | 116.0(5) | F(8)-C(57)-C(59)  | 118.5(6)   |
| N(2)-C(17)-C(29)  | 114.2(5) | C(58)-C(57)-C(59) | 119.9(6)   |
| C(21)-N(3)-C(25)  | 113.5(5) | N(6)-C(58)-C(57)  | 121.1(6)   |
| C(48)-C(19)-C(13) | 120.3(6) | N(6)-C(58)-H(58)  | 119.4      |
| C(48)-C(19)-H(19) | 119.9    | C(57)-C(58)-H(58) | 119.4      |
| C(13)-C(19)-H(19) | 119.9    | N(7)-C(59)-C(57)  | 119.4(6)   |
| C(43)-N(9)-C(16)  | 116.7(5) | N(7)-C(59)-H(59)  | 120.3      |
| N(4)-C(21)-N(3)   | 130.0(5) | C(57)-C(59)-H(59) | 120.3      |
| N(4)-C(21)-C(63)  | 115.5(5) | N(1)-C(60)-C(15)  | 122.1(5)   |



|                   |          |                   |          |
|-------------------|----------|-------------------|----------|
| N(3)-C(21)-C(63)  | 114.4(5) | N(1)-C(60)-H(60)  | 118.9    |
| N(8)-C(22)-C(28)  | 119.1(5) | C(15)-C(60)-H(60) | 118.9    |
| N(8)-C(22)-H(22)  | 120.5    | C(14)-C(62)-C(68) | 118.9(8) |
| C(28)-C(22)-H(22) | 120.5    | C(14)-C(62)-H(62) | 120.6    |
| C(46)-C(23)-C(14) | 123.1(7) | C(68)-C(62)-H(62) | 120.6    |
| C(46)-C(23)-H(23) | 118.4    | F(6)-C(63)-F(7)   | 108.0(8) |
| C(14)-C(23)-H(23) | 118.4    | F(6)-C(63)-F(5)   | 104.5(7) |
| C(12)-C(24)-C(67) | 120.3(7) | F(7)-C(63)-F(5)   | 99.5(7)  |
| C(12)-C(24)-H(24) | 119.8    | F(6)-C(63)-C(21)  | 113.8(6) |
| C(67)-C(24)-H(24) | 119.8    | F(7)-C(63)-C(21)  | 115.4(6) |
| N(3)-C(25)-C(8)   | 122.4(5) | F(5)-C(63)-C(21)  | 114.3(6) |
| N(3)-C(25)-H(25)  | 118.8    | C(67)-C(66)-C(38) | 120.5(6) |
| C(8)-C(25)-H(25)  | 118.8    | C(67)-C(66)-H(66) | 119.7    |
| C(13)-C(26)-C(27) | 120.3(6) | C(38)-C(66)-H(66) | 119.7    |
| C(13)-C(26)-H(26) | 119.9    | C(66)-C(67)-C(24) | 120.5(7) |
| C(27)-C(26)-H(26) | 119.9    | C(66)-C(67)-H(67) | 119.8    |
| C(33)-C(27)-C(26) | 120.0(6) | C(24)-C(67)-H(67) | 119.8    |
| C(33)-C(27)-H(27) | 120.0    | C(42)-C(68)-C(62) | 121.4(9) |
| C(26)-C(27)-H(27) | 120.0    | C(42)-C(68)-H(68) | 119.3    |
| F(4)-C(28)-C(22)  | 119.8(6) | C(62)-C(68)-H(68) | 119.3    |
| F(4)-C(28)-C(43)  | 120.5(5) | C(37)-C(69)-C(47) | 120.3(8) |
| C(22)-C(28)-C(43) | 119.7(6) | C(37)-C(69)-H(69) | 119.8r   |
| F(2)-C(29)-F(1)   | 111.8(8) | C(47)-C(69)-H(69) | 119.8    |

## References

- 1 (a) D. P. Rillema, D. G. Taghdiri, D. S. Jones, C. D. Keller, L. A. Worl, T. J. Meyer and H. A. Levy, *Inorg. Chem.*, 1987, **26**, 578; (b) K. A. King, P. J. Spellane and R. J. Watts, *J. Am. Chem. Soc.*, 1985, **25**, 1431.
- 2 *SAINT-Plus, version 6.02*, Bruker Analytical X-ray System, Madison, WI, 1999.
- 3 G. M. Sheldrick, *SADABS An empirical absorption correction program, Bruker Analytical X-ray Systems*, Madison, WI, 1996.
- 4 G. M. Sheldrick, *SHELXTL-2014*, Universität of Göttingen, Göttingen, Germany, 2014.
